# Supplementary material
Source: PubMed Central journal article supplement (PMC3443564)
Supplement: NIHMS397369-supplement-1_si_001.pdf [file NIHMS397369-supplement-1_si_001.pdf]

## Supporting information

### One-Electron Oxidation of Neutral Sugar Radicals of 2'-Deoxyguanosine and 2'-deoxythymidine. A Density Functional Theory (DFT) Study

Anil Kumar, Venkata Pottiboyina, and Michael D. Sevilla\*  
Department of Chemistry  
Oakland University, Rochester, Michigan 48309

#### List of Contents

**Figure S1-** The B3LYP/6-31++G(D) optimized structure of 2'-deoxyguanosine with atom numbering. In the adjacent table the sum of the three angles centering the C<sub>1'</sub>, C<sub>2'</sub>, C<sub>3'</sub>, C<sub>4'</sub> and C<sub>5'</sub> atoms in 2'-deoxyguanosine are given in degrees, see discussion in text. Optimized structure of the 1'-NH<sub>2</sub>-furanose (sugar moiety) (guanine base replaced by NH<sub>2</sub> group) used for the calculations, see text.

**Figure S2-** B3LYP/6-31++G(D) optimized structures of C1'', C2'', C3'', C4'' and C5'' radicals in gas phase and in solution. Distances are given in Å. Values in bold are the sum of angles centering the carbon atoms.

**Figure S3-** B3LYP/6-31++G(D) optimized structures of sugar radicals in their cation states. Structures were fully optimized in gas phase and in aqueous phase using PCM. Values in bold are the sum of angles centering the carbon atoms.

**Figure S4-** ωB97x/6-31++G(D) optimized structures of C1'', C2'', C3'', C4'' and C5'' radicals in gas phase and in solution. Distances are given in Å. Values in bold are the sum of angles centering the carbon atoms.

**Figure S5-** ωB97x/6-31++G(D) optimized structures of sugar radicals in their cation states (C<sub>1'</sub><sup>+</sup>, C<sub>2'</sub><sup>+</sup>, C<sub>3'</sub><sup>+</sup>, C<sub>4'</sub><sup>+</sup>, C<sub>5'</sub><sup>+</sup>). Structures were fully optimized in gas phase and in aqueous phase using PCM. Values in bold are the sum of angles centering the carbon atoms.

**Figure S6-** B3LYP/6-31++G(D) optimized structures of C1'', C2'', C3'', C4'' and C5'' radicals of 2'-deoxythymidine and their cation in gas phase. Distances are given in Å. Values in bold are the sum of angles centering the carbon atoms.

**Figure S7-** B3LYP/6-31++G(D) optimized structures of C1'', C2'', C3'', C4'' and C5'' radicals of 2'-deoxythymidine and their cation in solution. Distances are given in Å. Values in bold are the sum of angles around the respective Cn' site.

**Figure S8-** B3LYP/6-31++G(D) optimized two diastereoisomeric forms of 5'-8-cyclo-2'-dG in their radical and cation states. Structures were fully optimized in the gas phase.

**Figure S9-** B3LYP/6-31++G(d) calculated Mulliken spin density distribution in sugar radicals ( $dT(C1'\bullet) - dT(C5'\bullet)$ ). Spin densities were calculated with 0.002 electron/bohr<sup>3</sup>.

**Table T1-** B3LYP/6-31++G(D) and  $\omega$ B97x/6-31++G(D) calculated vertical ionization potentials (IPs) in eV of neutral sugar radicals in gas phase and in aqueous solution using the 1'-NH<sub>2</sub>-furanose model system. See Figure S1 in the SI.

**Table T2** B3LYP/6-31++G(D) calculated Mulliken Atomic Spin Densities and isotropic hyperfine couplings for the C1'', C2'', C3'', C4'' and C5''

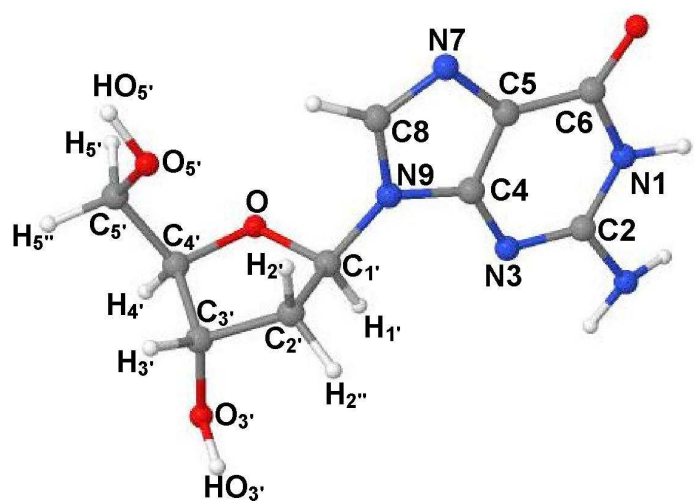

2'-deoxyguanosine

| Angle        | Deg.         | Angle        | Deg.         |
|--------------|--------------|--------------|--------------|
| N9-C1'-O     | 109.0        | C3'-C4'-O    | 106.6        |
| O-C1'-C2'    | 105.6        | O-C4'-C5'    | 110.0        |
| C2'-C1'-N9   | 114.4        | C5'-C4'-C3'  | 114.7        |
| <b>Sum</b>   | <b>329.0</b> | <b>Sum</b>   | <b>331.3</b> |
| C1'-C2'-C3'  | 103.0        | C4'-C5'-O5'  | 109.3        |
| C3'-C2'-H2'' | 113.1        | O5'-C5'-H5'' | 110.6        |
| C1'-C2'-H2'' | 112.1        | C4'-C5'-H5'' | 108.7        |
| <b>Sum</b>   | <b>328.2</b> | <b>Sum</b>   | <b>328.6</b> |
| C2'-C3'-C4'  | 102.8        |              |              |
| C4'-C3'-O3'  | 106.6        |              |              |
| C2'-C3'-O3'  | 112.8        |              |              |
| <b>Sum</b>   | <b>322.2</b> |              |              |

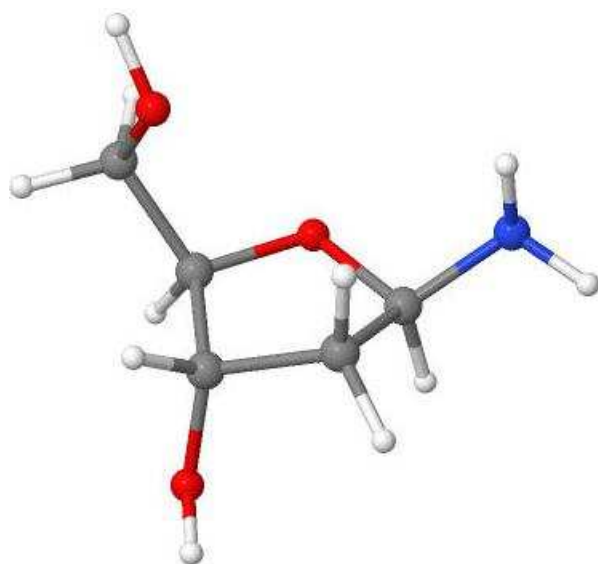

1'-NH<sub>2</sub>-furanose

**Figure S1-** The B3LYP/6-31++G(D) optimized structure of 2'-deoxyguanosine with atom numbering. In the adjacent table the sum of the three angles centering the C<sub>1</sub>, C<sub>2</sub>, C<sub>3</sub>, C<sub>4</sub> and C<sub>5</sub> atoms in 2'-deoxyguanosine are given in degrees, see discussion in text. Optimized structure of the 1'-NH<sub>2</sub>-furanose (sugar moiety) (guanine base replaced by NH<sub>2</sub> group) used for the calculations, see text.

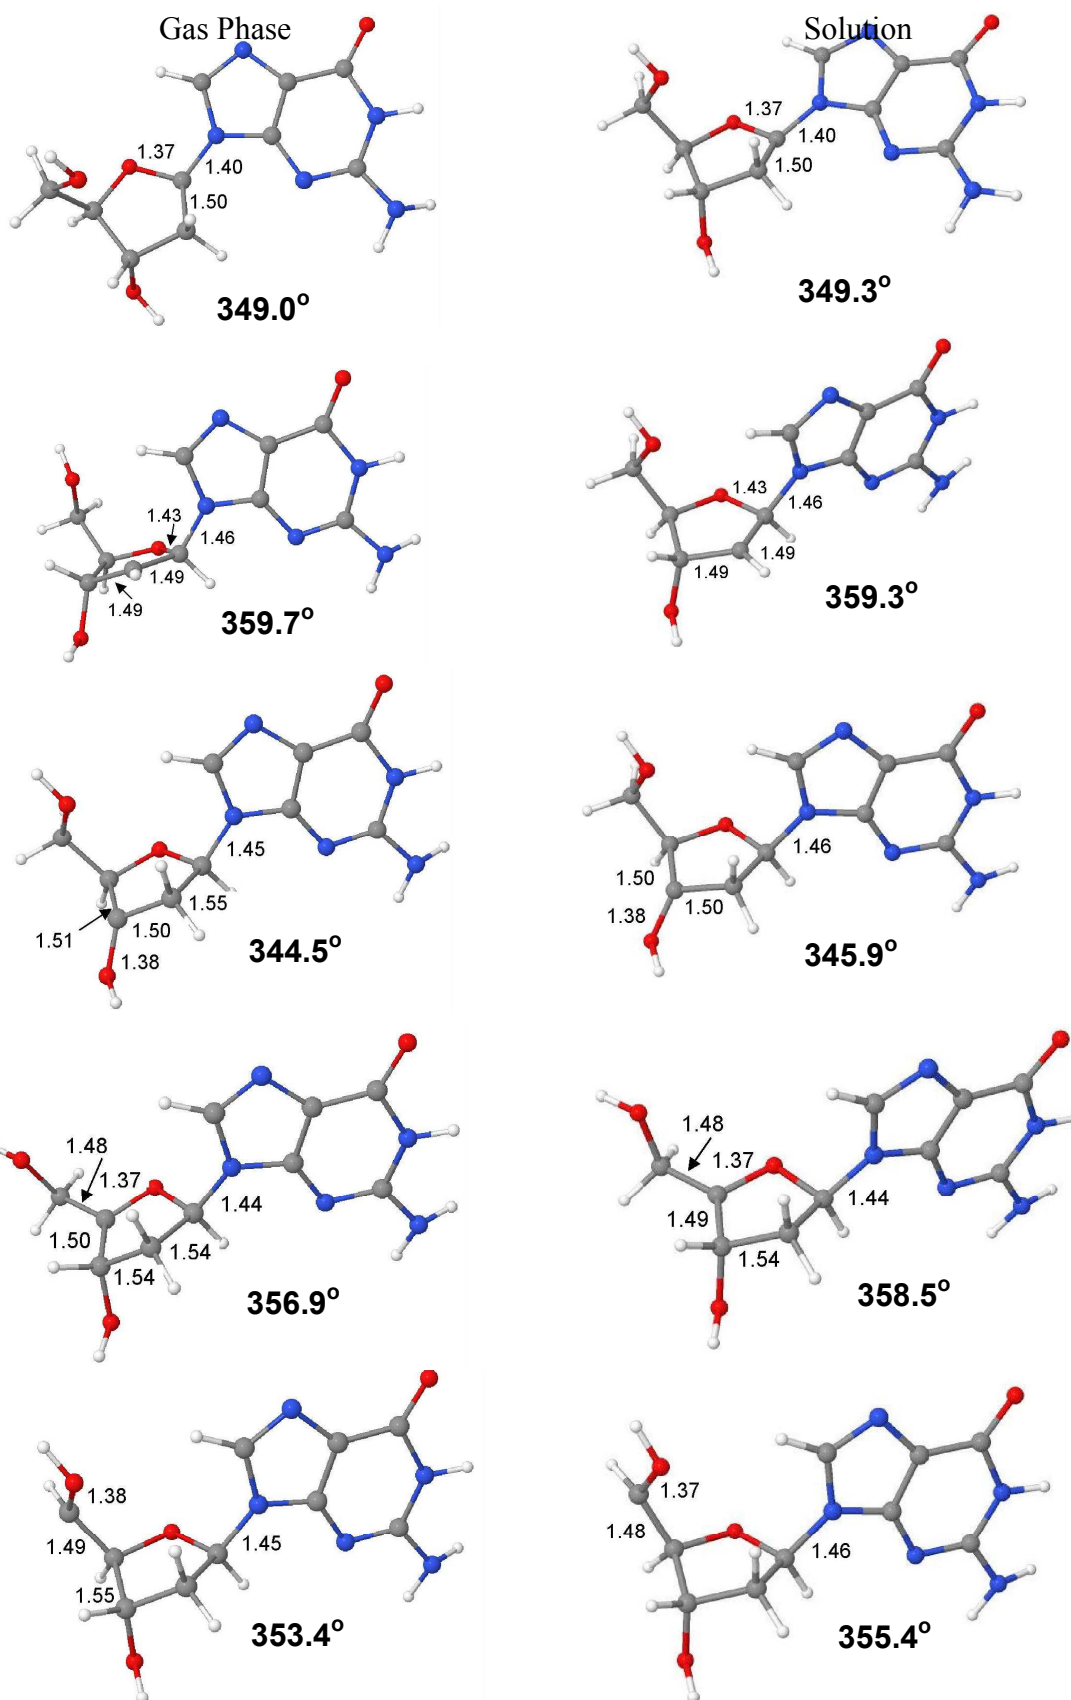

**Figure S2-** B3LYP/6-31++G(D) optimized structures of C1', C2', C3', C4' and C5' radicals in gas phase and in solution. Distances are given in Å. Values in bold are the sum of angles centering the carbon atoms.

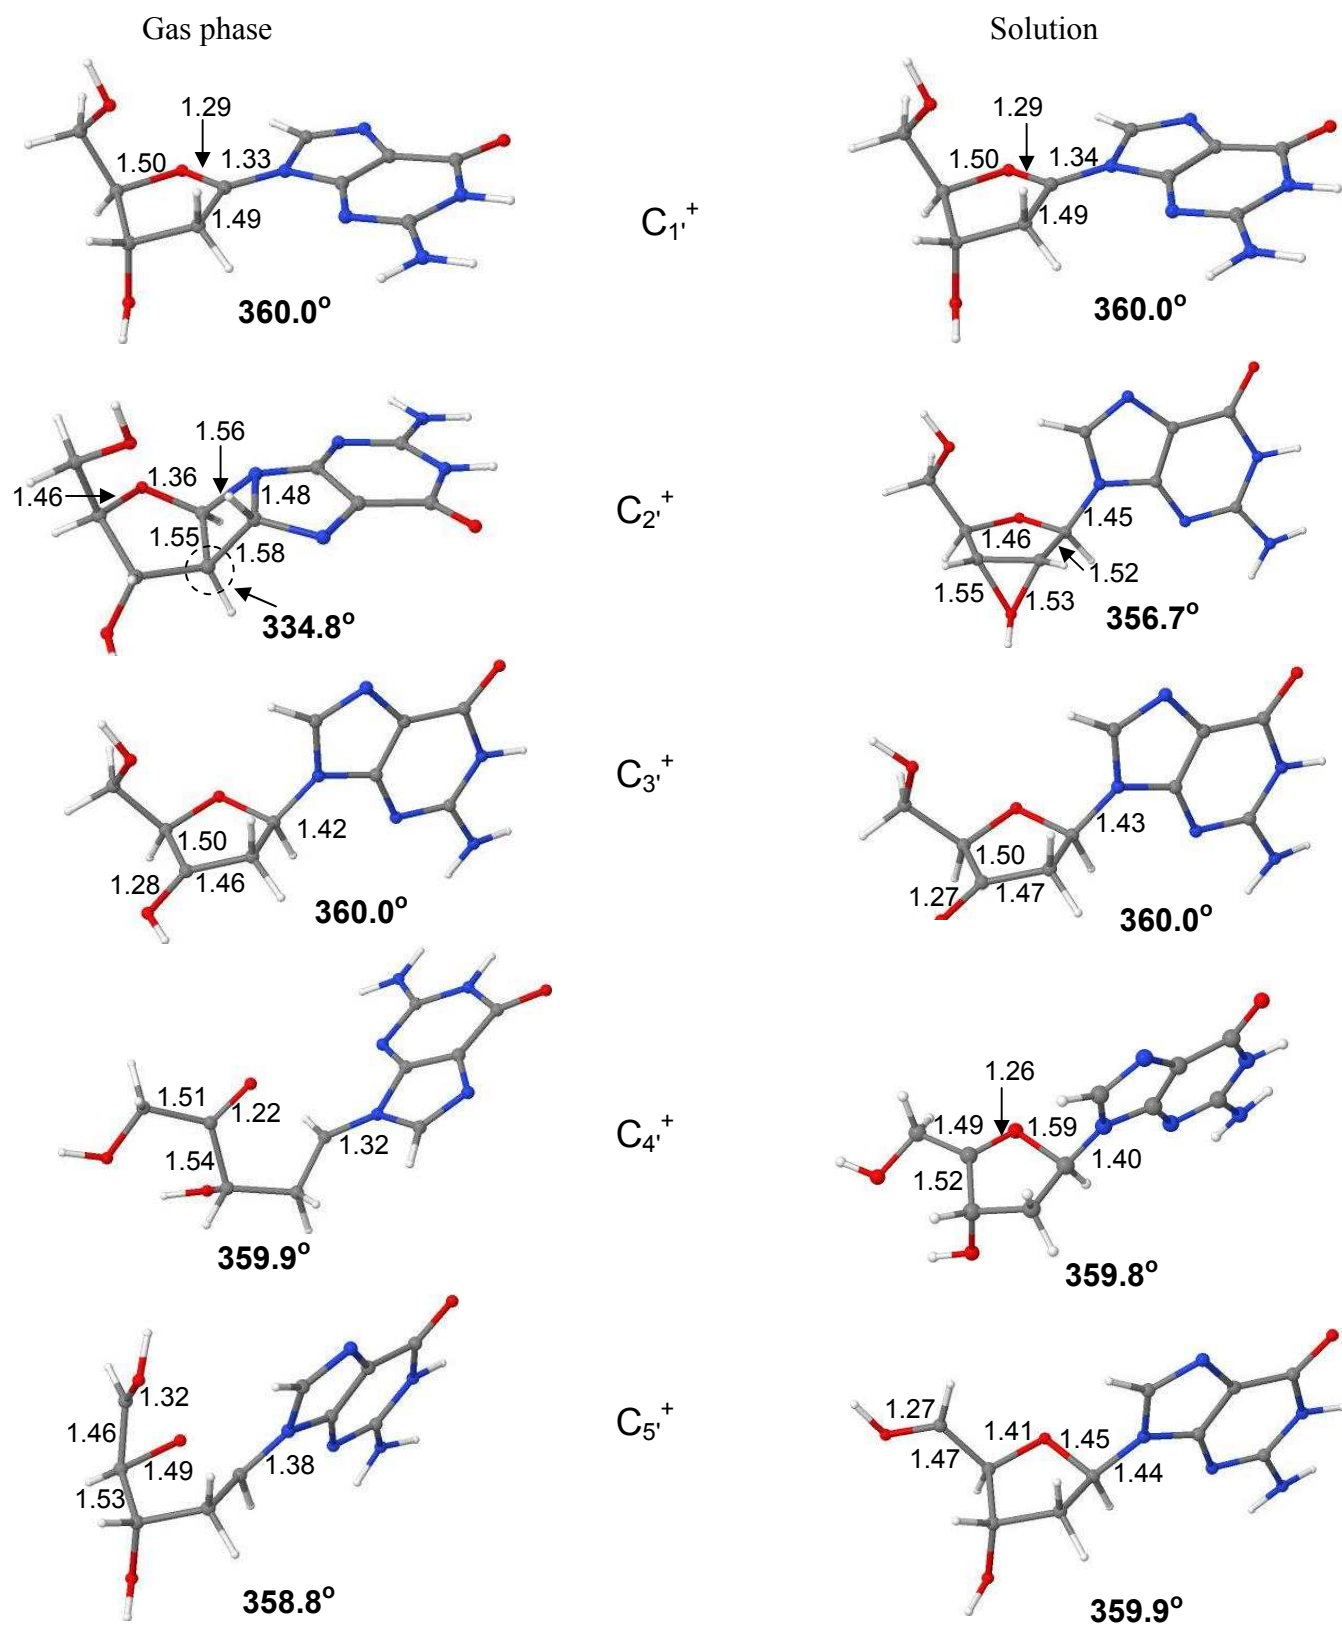

**Figure S3-** B3LYP/6-31++G(D) optimized structures of sugar radicals in their cation states. Structures were fully optimized in gas phase and in aqueous phase using PCM. Values in bold are the sum of angles centering the carbon atoms.

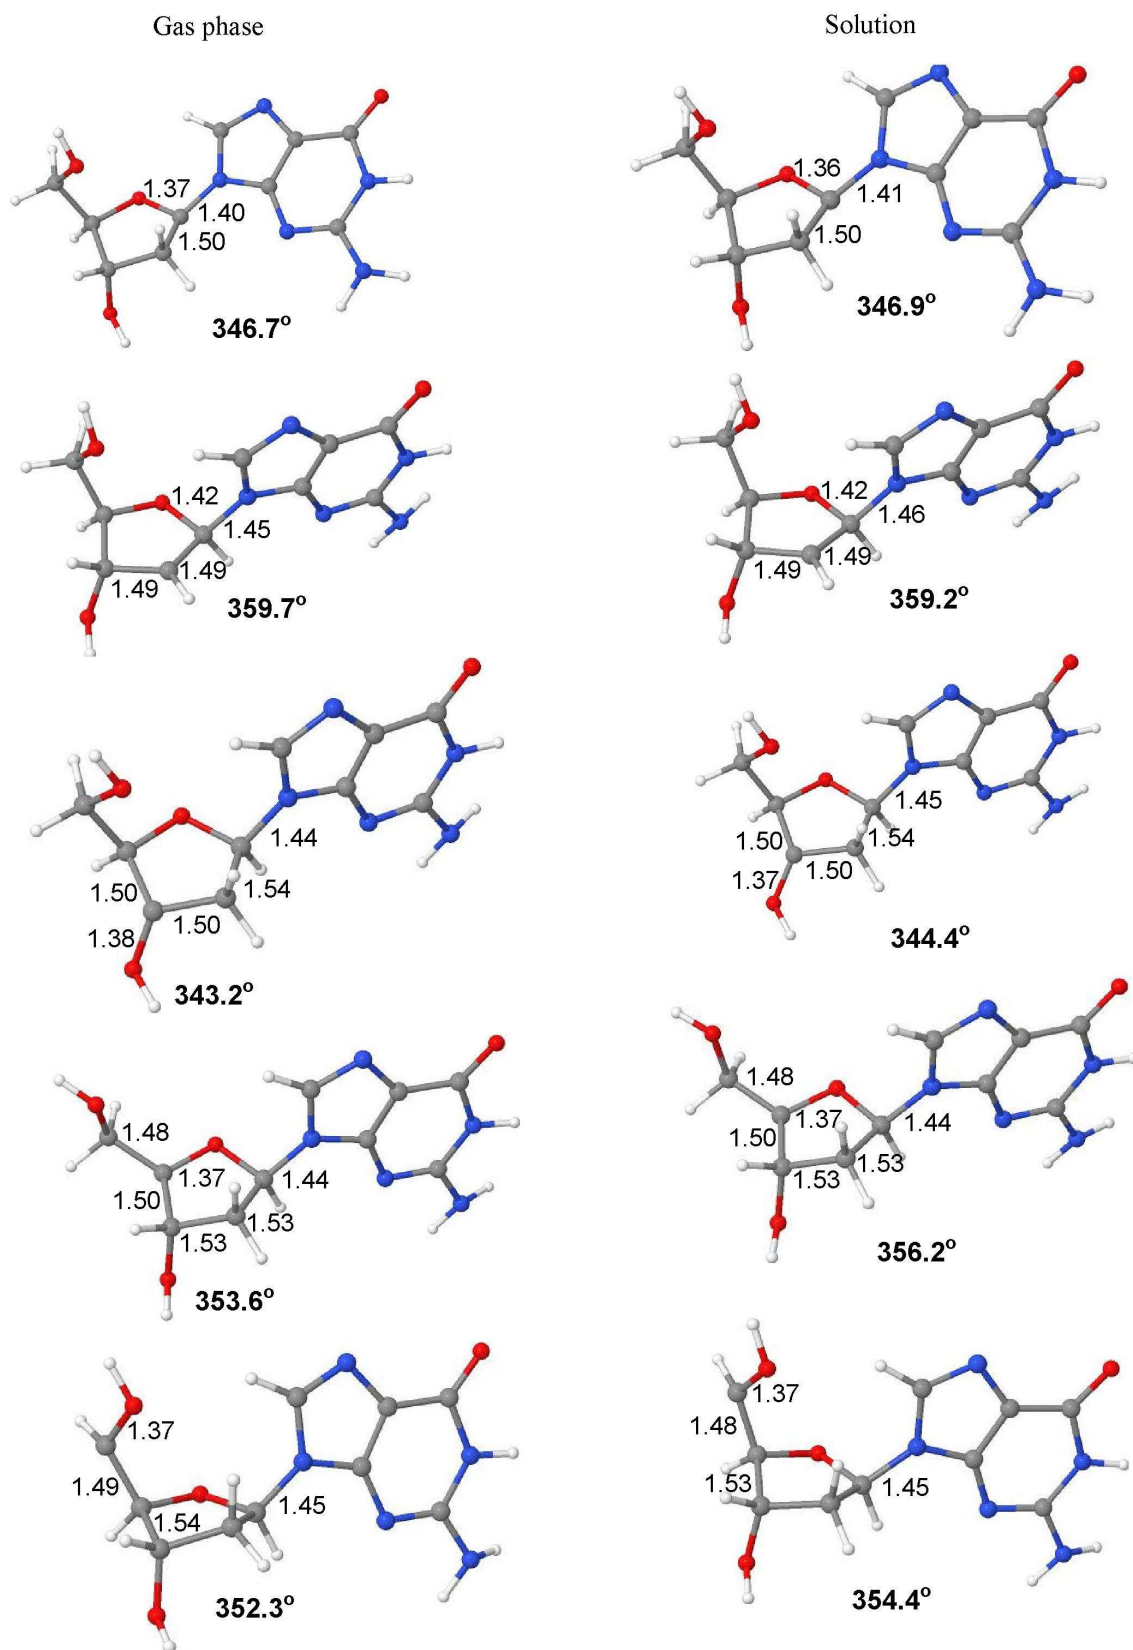

**Figure S4-**  $\omega$ B97x/6-31++G(D) optimized structures of C1<sup>\*</sup>, C2<sup>\*</sup>, C3<sup>\*</sup>, C4<sup>\*</sup> and C5<sup>\*</sup> radicals in gas phase and in solution. Distances are given in Å. Values in bold are the sum of angles centering the carbon atoms.

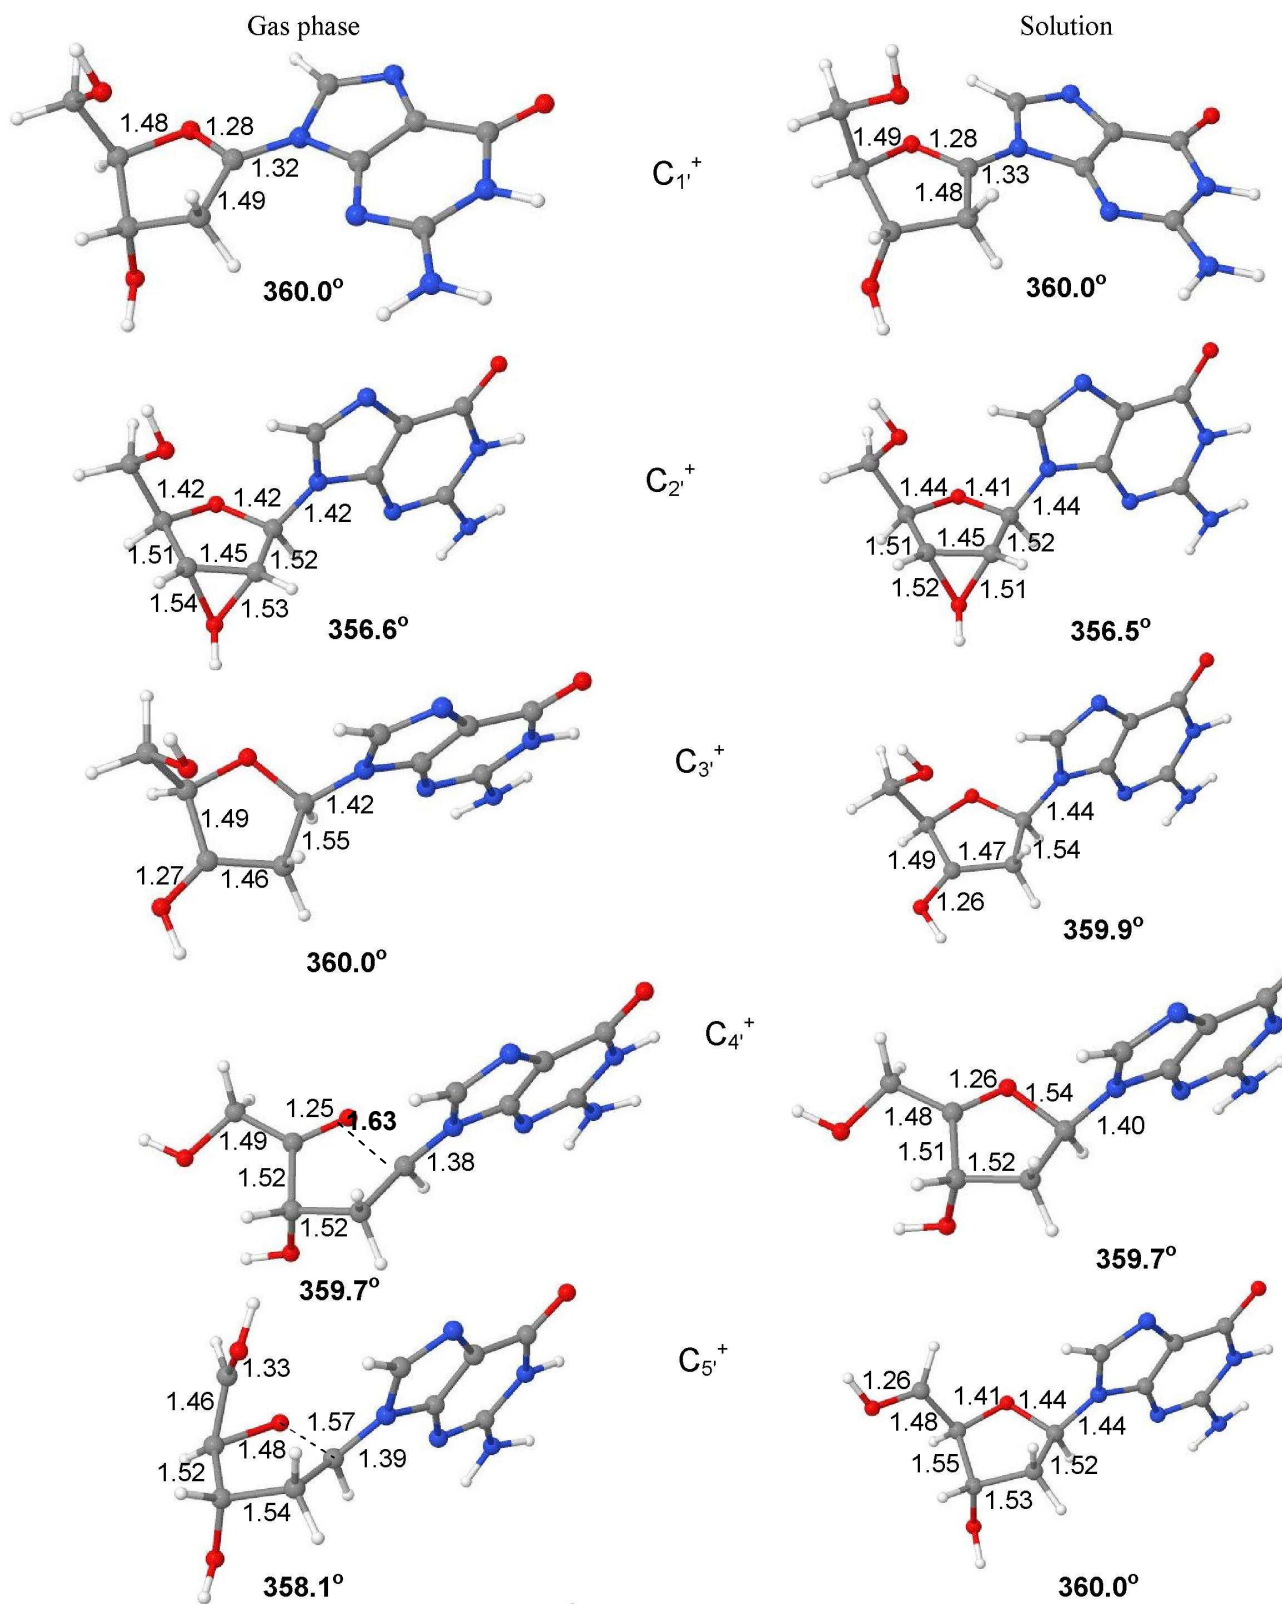

**Figure S5-**  $\omega$ B97x/6-31++G(D) optimized structures of sugar radicals in their cation states ( $C_1^+$ ,  $C_2^+$ ,  $C_3^+$ ,  $C_4^+$ ,  $C_5^+$ ). Structures were fully optimized in gas phase and in aqueous phase using PCM. Values in bold are the sum of angles centering the carbon atoms.

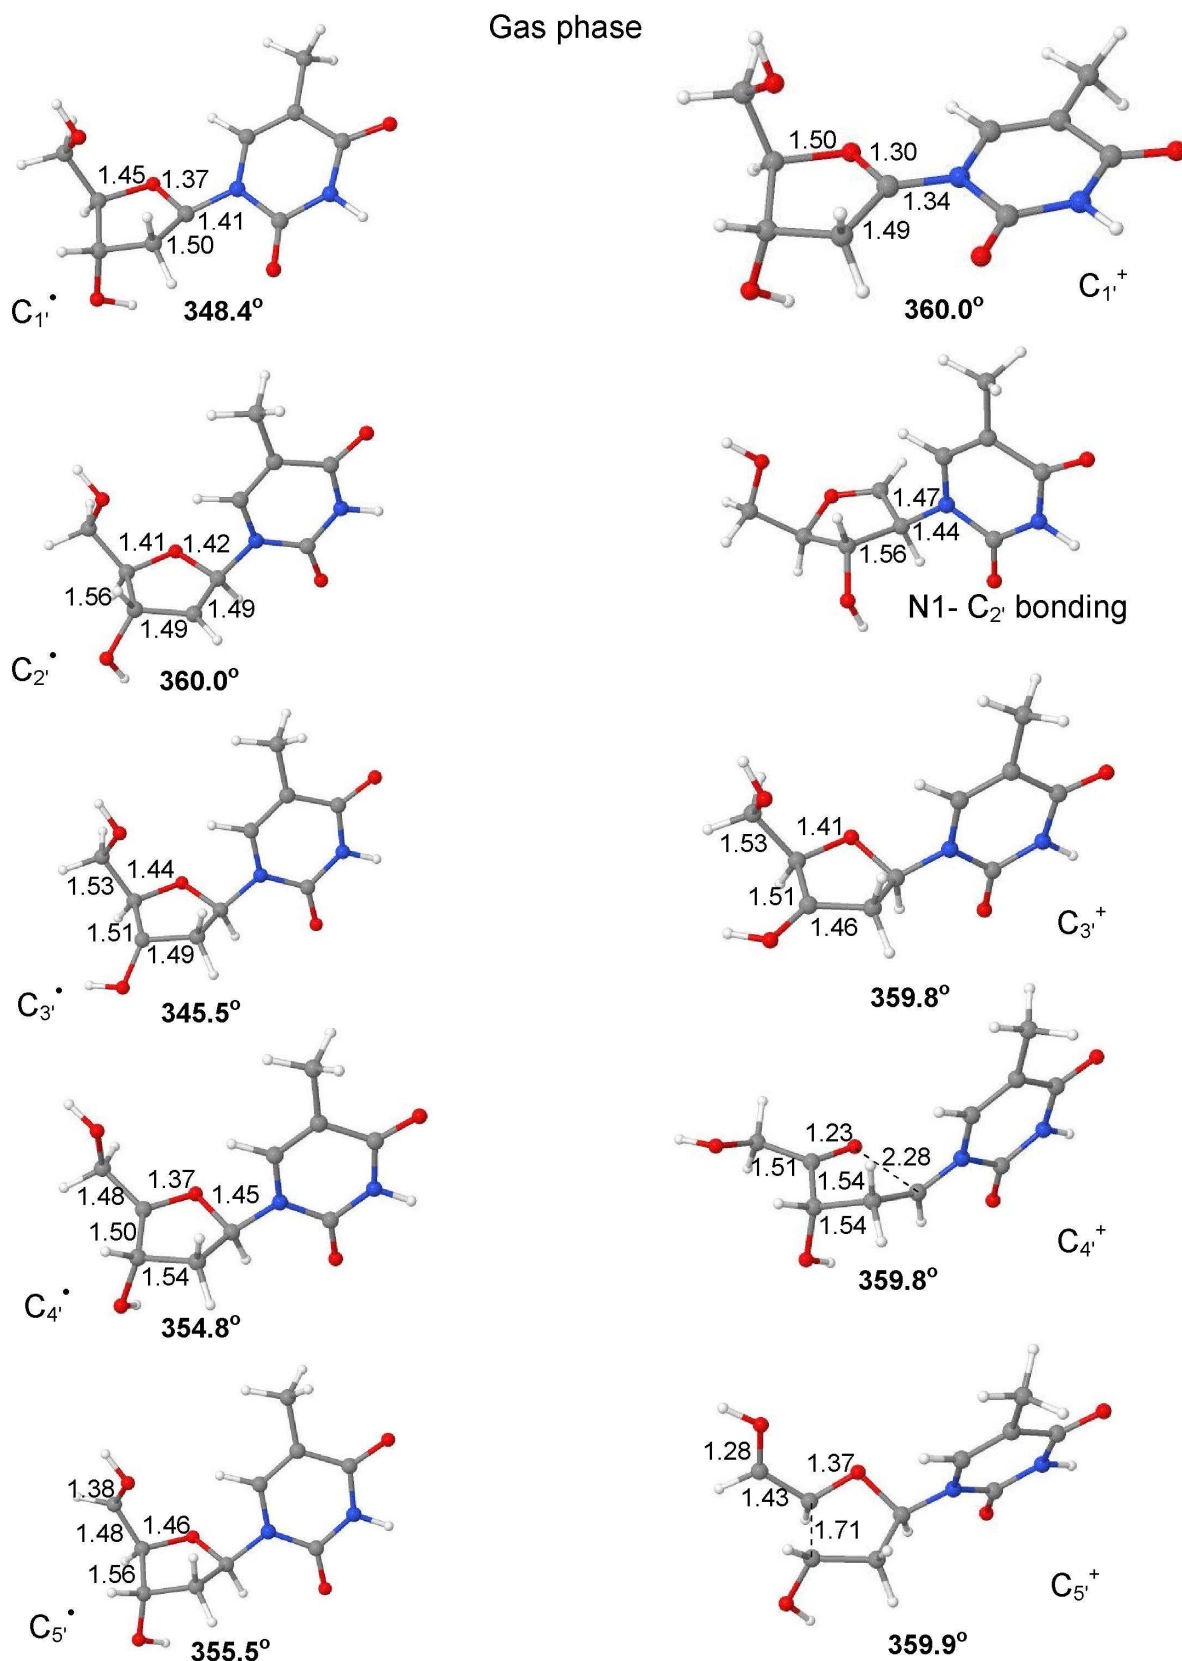

**Figure S6-** B3LYP/6-31++G(D) optimized structures of C<sub>1</sub>'<sup>•</sup>, C<sub>2</sub>'<sup>•</sup>, C<sub>3</sub>'<sup>•</sup>, C<sub>4</sub>'<sup>•</sup> and C<sub>5</sub>'<sup>•</sup> radicals of 2'-deoxythymidine and their cations in gas phase. Distances are given in Å. Values in bold are the sum of angles around the respective C<sub>n</sub>' site.



Solution (PCM)

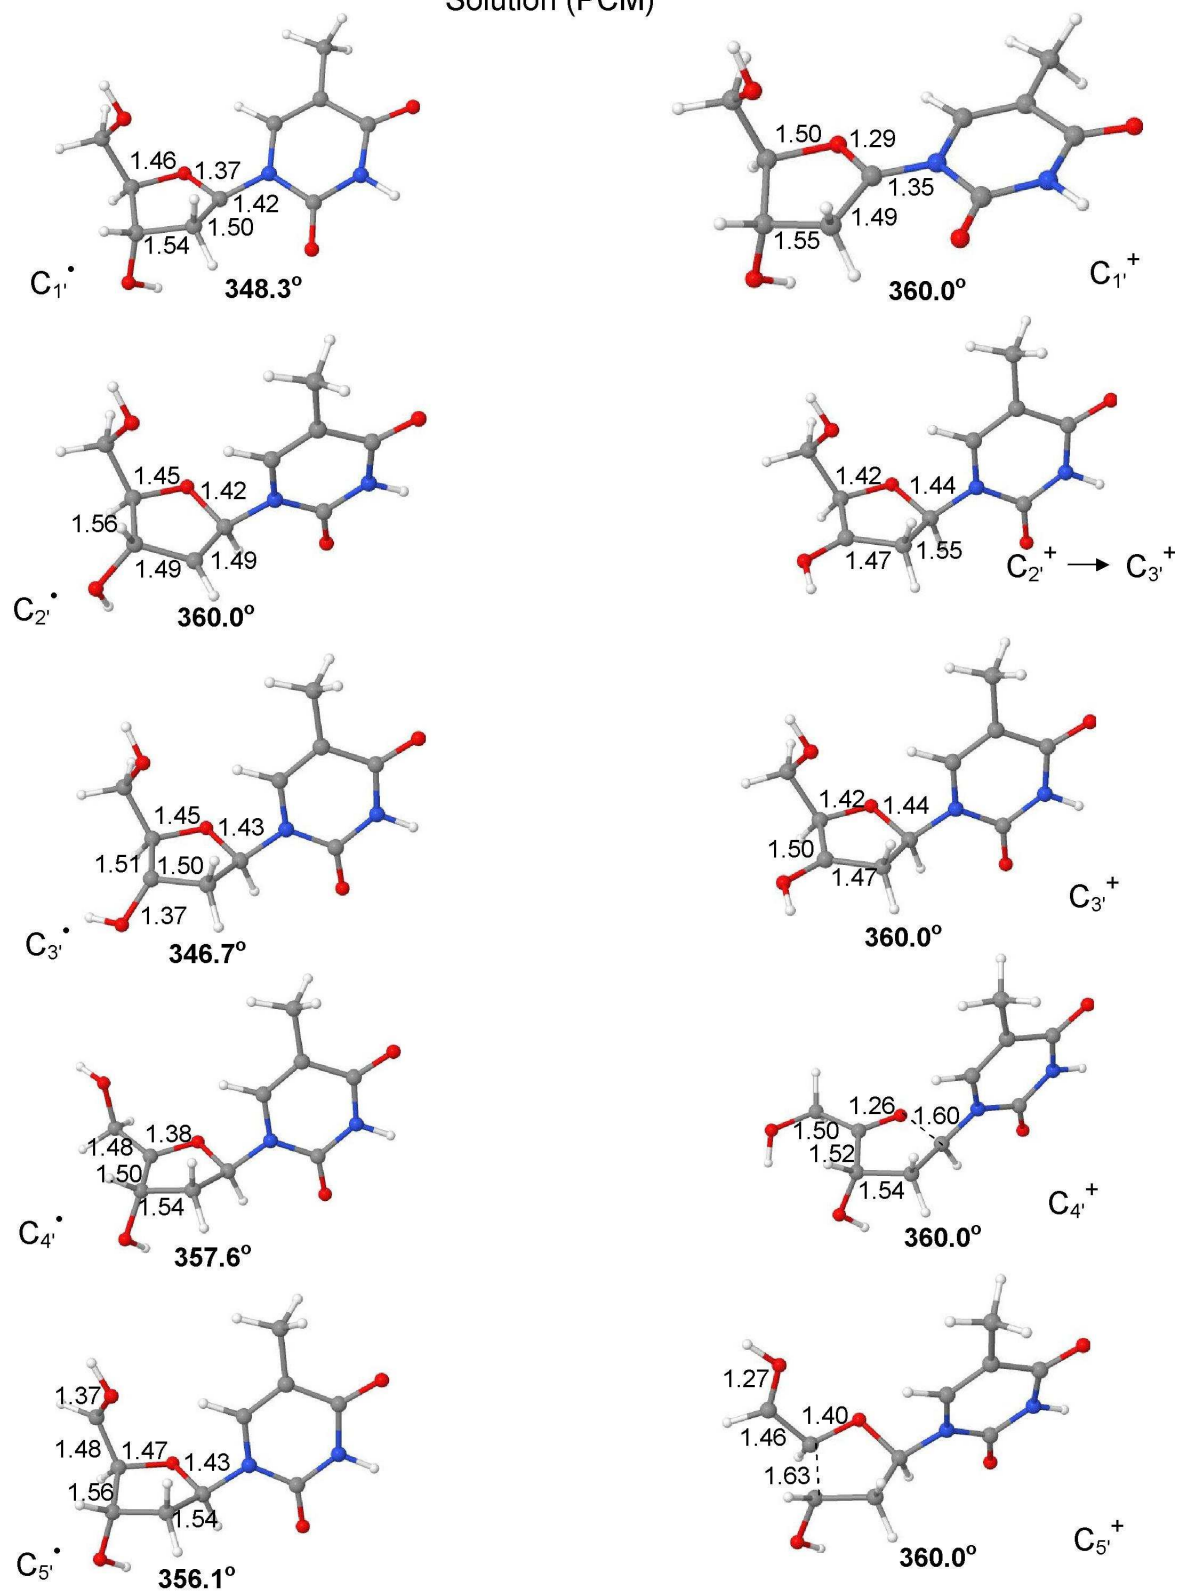

**Figure S7-** B3LYP/6-31++G(D) optimized structures of  $C_1^\bullet$ ,  $C_2^\bullet$ ,  $C_3^\bullet$ ,  $C_4^\bullet$  and  $C_5^\bullet$  radicals of 2'-deoxythymidine and their cations in solution. Distances are given in Å. Values in bold are the sum of angles centering the carbon atoms.

(Radical)

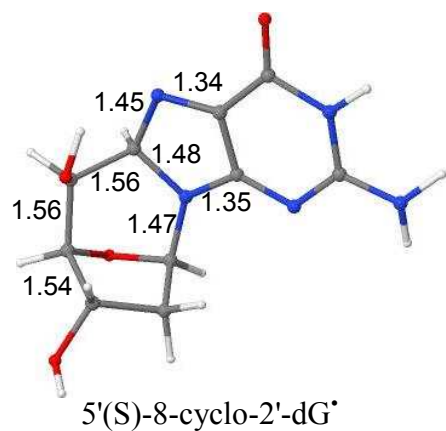

(Cation)

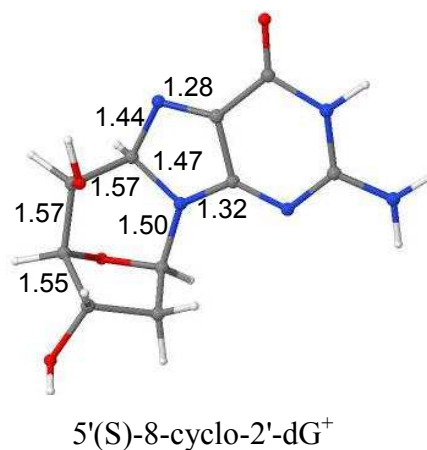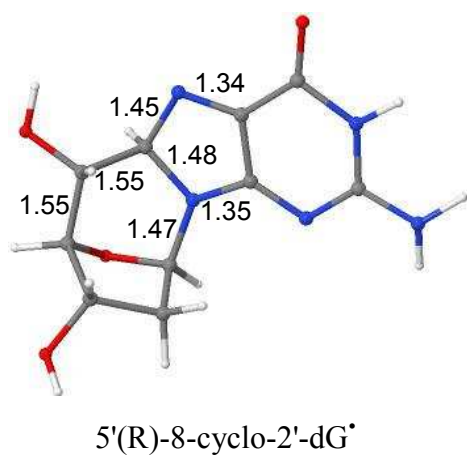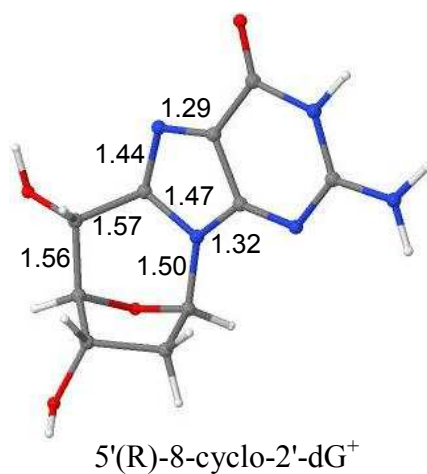

**Figure S8-** B3LYP/6-31++G(D) optimized two diastereoisomeric forms of 5'-8-cyclo-2'-dG in their radical and cation states. Structures were fully optimized in the gas phase.

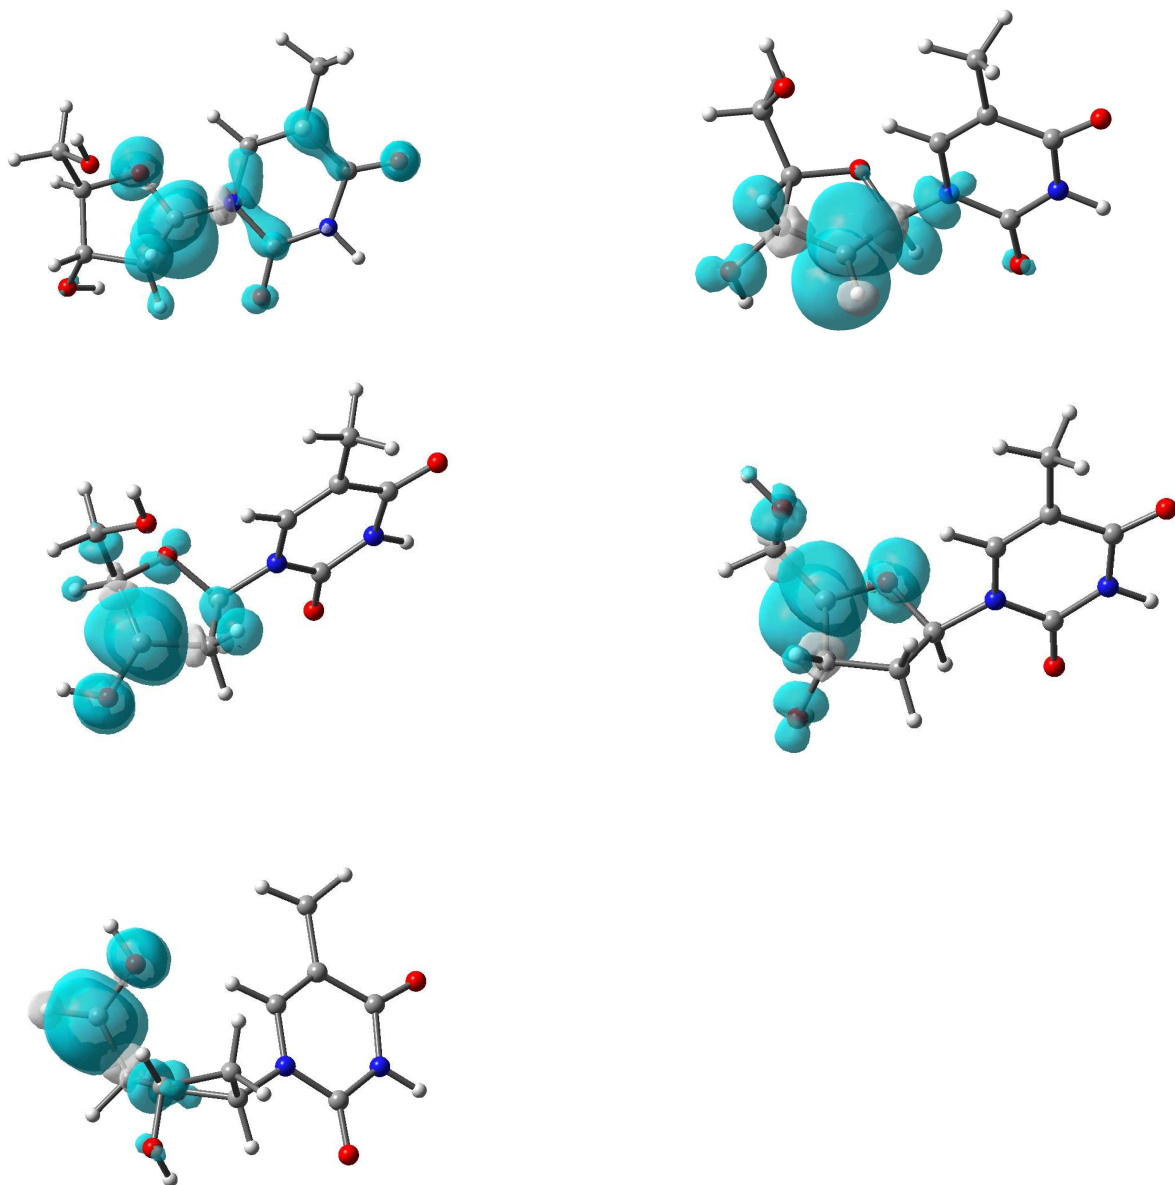

**Figure S9-** B3LYP/6-31++G(d) calculated Mulliken spin density distribution in sugar radicals ( $dT(C1'\bullet) - dT(C5'\bullet)$ ). Spin densities were calculated with 0.002 electron/bohr<sup>3</sup>.

A small delocalization of spin on N9, C4, C8 and N7 atoms of guanine is seen from the spin density distribution maps (Figure 1) of C<sub>1</sub>' and C<sub>2</sub>' radicals. Therefore, we tested the degree that the guanine base lowers the IP of the sugar radicals by considering a model of deoxyribose (sugar) by replacing the guanine base with NH<sub>2</sub> group connected at the C<sub>1</sub>' atom of the sugar ring, see Figure S1 in the SI. Using this model of the sugar moiety, we calculated the IPs of C<sub>1</sub>', C<sub>2</sub>', C<sub>3</sub>', C<sub>4</sub>' and C<sub>5</sub>' radicals in the gas phase and in solution. The calculated vertical IPs by the B3LYP/6-31++G(D) and  $\omega$ B97x/6-31++G(D) methods are given in Table S1. The calculated vertical IPs of C<sub>1</sub>'•, C<sub>2</sub>'•, C<sub>3</sub>'•, C<sub>4</sub>'• and C<sub>5</sub>'• using this sugar model are slightly lower both in the gas phase and in solution than those calculated for the corresponding sugar radical of 2'-deoxyguanosine and 2'-deoxythymidine. The gas phase IPs of C<sub>2</sub>'• and C<sub>5</sub>'• are in close agreement while the IPs of C<sub>1</sub>'•, C<sub>3</sub>'• and C<sub>4</sub>'• differ by ca. 0.4 eV, see Tables 2 and S1. In both the models C<sub>1</sub>'• has the lowest IP while C<sub>2</sub>'• has the highest IP.

**Table T1-** B3LYP/6-31++G(D) and  $\omega$ B97x/6-31++G(D) calculated vertical ionization potentials (IPs) in eV of neutral sugar radicals in gas phase and in aqueous solution using the 1'-NH<sub>2</sub>-furanose model system. See Figure S1 in the SI.

| Sugar radical     | B3LYP/6-31++G(d)   |                            | $\omega$ B97x/6-31++G(d) |                            |
|-------------------|--------------------|----------------------------|--------------------------|----------------------------|
|                   | Gas phase          | Aqueous phase <sup>a</sup> | Gas phase                | Aqueous phase <sup>a</sup> |
|                   | IP <sup>vert</sup> | IP <sup>vert</sup>         | IP <sup>vert</sup>       | IP <sup>vert</sup>         |
| C <sub>1</sub> '• | 5.99               | 4.13                       | 6.19                     | 4.41                       |
| C <sub>2</sub> '• | 8.01               | 6.00                       | 8.24                     | 6.16                       |
| C <sub>3</sub> '• | 6.92               | 4.90                       | 7.22                     | 4.99                       |
| C <sub>4</sub> '• | 6.76               | 4.95                       | 6.87                     | 5.05                       |
| C <sub>5</sub> '• | 7.55               | 5.30                       | 7.69                     | 5.34                       |

<sup>a</sup>Calculated using IEFPCM model with  $\epsilon = 78.38$ .

**Table T2-** B3LYP/6-31++G(D) calculated Mulliken Atomic Spin Densities and Isotropic Hyperfine Couplings for the C1'•, C2'•, C3'•, C4'• and C5'• sugar radicals of 2'deoxyguanosine (dG)

| dG(C1'•) | atom     | Spin (1) | Isotropic Gauss |
|----------|----------|----------|-----------------|
|          | 1 O(17)  | .095790  | -10.36925       |
|          | 2 C(13)  | 1.004808 | 78.66118        |
|          | 3 C(13)  | -.184000 | .18772          |
|          | 4 C(13)  | .011642  | .18643          |
|          | 5 C(13)  | -.053298 | -.52089         |
|          | 6 N(14)  | -.070142 | .08451          |
|          | 7 C(13)  | -.016806 | 2.73380         |
|          | 8 C(13)  | .033301  | -.26014         |
|          | 9 N(14)  | .037717  | .75494          |
|          | 10 C(13) | .037819  | 2.11742         |
|          | 11 N(14) | .003980  | -.02145         |
|          | 12 C(13) | .011525  | .38513          |
|          | 13 N(14) | .006482  | .14033          |
|          | 14 C(13) | .011772  | -.39325         |
|          | 15 N(14) | .002957  | .15483          |
|          | 16 O(17) | -.001236 | .04958          |
|          | 17 O(17) | .002884  | -.48232         |
|          | 18 C(13) | .007748  | 1.57890         |
|          | 19 O(17) | -.000779 | -.20398         |
|          | 20 H(1)  | .003388  | .16708          |
|          | 21 H(1)  | .000246  | .25424          |
|          | 22 H(1)  | -.001532 | .00318          |
|          | 23 H(1)  | .067436  | 29.61253        |
|          | 24 H(1)  | -.001088 | 13.88135        |
|          | 25 H(1)  | -.003632 | 1.03004         |
|          | 26 H(1)  | .006958  | .71034          |
|          | 27 H(1)  | -.003137 | .22174          |
|          | 28 H(1)  | -.002618 | -1.54099        |
|          | 29 H(1)  | -.008330 | -.56903         |
|          | 30 H(1)  | .000189  | -.02556         |
|          | 31 H(1)  | -.000046 | -.20444         |

| dG(C2'•)                                                                            | atom     | Spin (1) | Isotropic Gauss |
|-------------------------------------------------------------------------------------|----------|----------|-----------------|
| 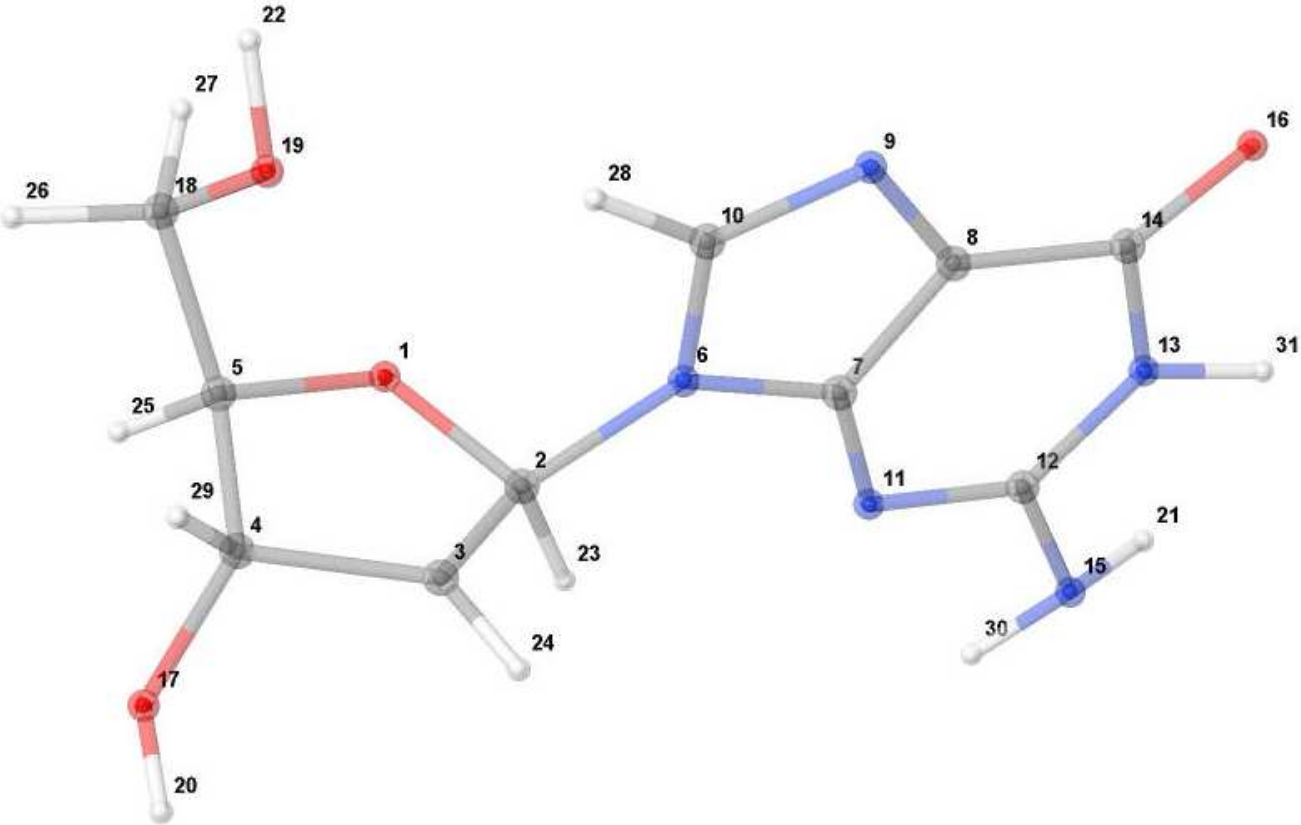 | 1 O(17)  | .003557  | -1.95062        |
|                                                                                     | 2 C(13)  | -.039321 | -8.46080        |
|                                                                                     | 3 C(13)  | 1.034888 | 43.43506        |
|                                                                                     | 4 C(13)  | -.047842 | -6.95101        |
|                                                                                     | 5 C(13)  | -.035507 | .31864          |
|                                                                                     | 6 N(14)  | .010460  | 5.53764         |
|                                                                                     | 7 C(13)  | .031608  | -.02738         |
|                                                                                     | 8 C(13)  | -.000228 | 1.09475         |
|                                                                                     | 9 N(14)  | .000141  | .09414          |
|                                                                                     | 10 C(13) | -.024543 | .10857          |
|                                                                                     | 11 N(14) | .006452  | .48546          |
|                                                                                     | 12 C(13) | .001660  | .26972          |
|                                                                                     | 13 N(14) | -.000020 | .05273          |
|                                                                                     | 14 C(13) | -.005611 | .08964          |
|                                                                                     | 15 N(14) | -.000373 | -.00864         |
|                                                                                     | 16 O(17) | .000961  | -.04356         |
|                                                                                     | 17 O(17) | .046506  | -9.22707        |
|                                                                                     | 18 C(13) | .013046  | -.09621         |
|                                                                                     | 19 O(17) | .000087  | -.81983         |
|                                                                                     | 20 H(1)  | -.003452 | -2.12156        |
|                                                                                     | 21 H(1)  | -.000023 | -.01034         |
|                                                                                     | 22 H(1)  | .000737  | .21185          |
|                                                                                     | 23 H(1)  | .048640  | 33.27585        |
|                                                                                     | 24 H(1)  | -.055442 | -23.18284       |
|                                                                                     | 25 H(1)  | -.000932 | .24098          |
|                                                                                     | 26 H(1)  | -.001016 | .15335          |
|                                                                                     | 27 H(1)  | .000121  | .14086          |
|                                                                                     | 28 H(1)  | -.006848 | .61945          |
|                                                                                     | 29 H(1)  | .022276  | 13.14030        |
|                                                                                     | 30 H(1)  | -.000012 | .00108          |
|                                                                                     | 31 H(1)  | .000031  | .04250          |

## dG(C3'•)

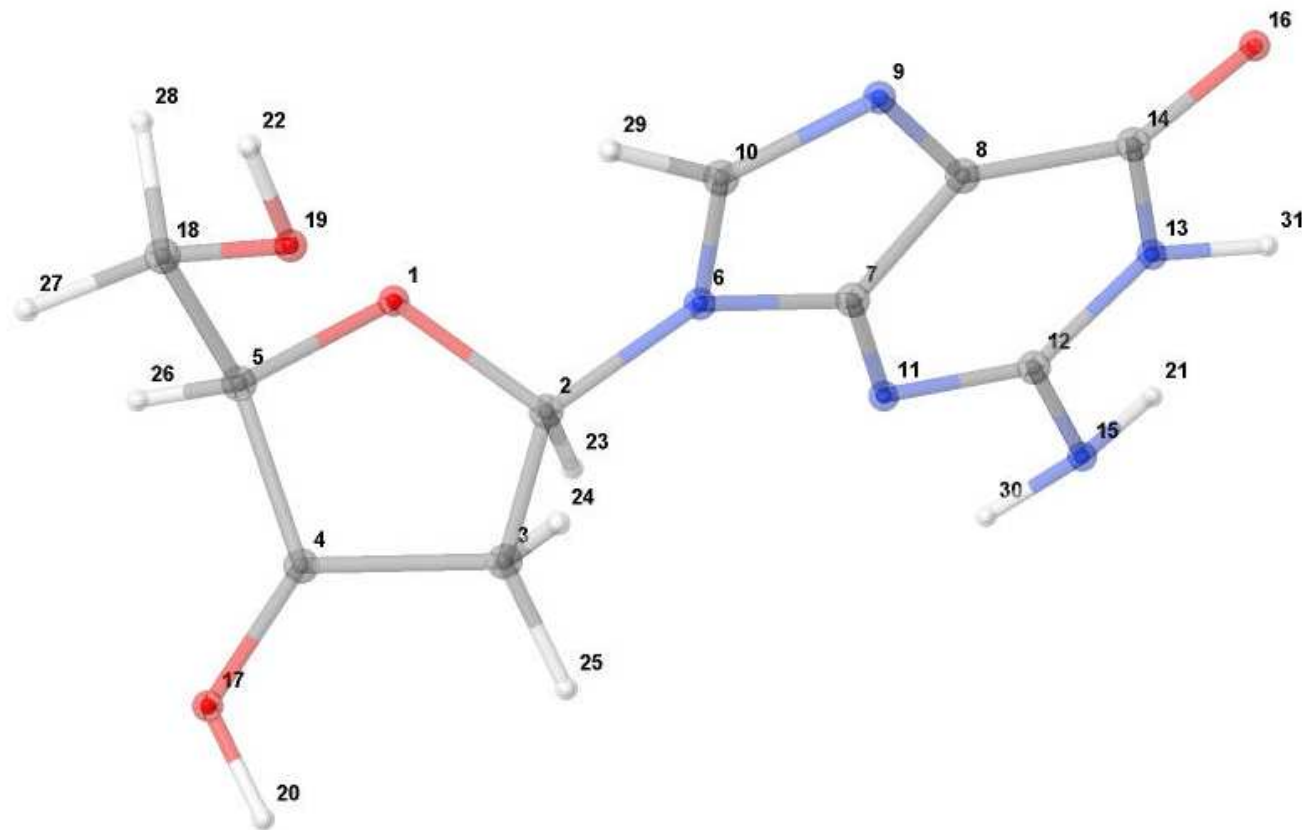

| atom     | Spin (1) | Isotropic Gauss |
|----------|----------|-----------------|
| 1 O(17)  | .017746  | -2.46813        |
| 2 C(13)  | .014308  | 12.76649        |
| 3 C(13)  | -.108405 | 1.24025         |
| 4 C(13)  | 1.058274 | 82.78717        |
| 5 C(13)  | -.133865 | .30793          |
| 6 N(14)  | .001821  | .05727          |
| 7 C(13)  | .004610  | .25614          |
| 8 C(13)  | .004436  | -.02308         |
| 9 N(14)  | .002999  | .05855          |
| 10 C(13) | .000033  | -.00087         |
| 11 N(14) | -.000078 | -.00542         |
| 12 C(13) | .001426  | .01089          |
| 13 N(14) | .000267  | .00185          |
| 14 C(13) | -.000080 | .00333          |
| 15 N(14) | .000194  | .00528          |
| 16 O(17) | -.000084 | .00149          |
| 17 O(17) | .094805  | -7.77108        |
| 18 C(13) | -.006549 | 8.99870         |
| 19 O(17) | -.001580 | -.35128         |
| 20 H(1)  | -.002608 | -2.23934        |
| 21 H(1)  | .000010  | .00567          |
| 22 H(1)  | -.000710 | -.09814         |
| 23 H(1)  | -.000688 | -.83642         |
| 24 H(1)  | .030804  | 23.01797        |
| 25 H(1)  | .006888  | 2.59371         |
| 26 H(1)  | .018392  | 7.29619         |
| 27 H(1)  | -.002698 | -.15367         |
| 28 H(1)  | .000711  | 1.08164         |
| 29 H(1)  | -.000401 | .06472          |
| 30 H(1)  | .000027  | -.00093         |
| 31 H(1)  | -.000003 | -.00540         |

## dG(C4'•)

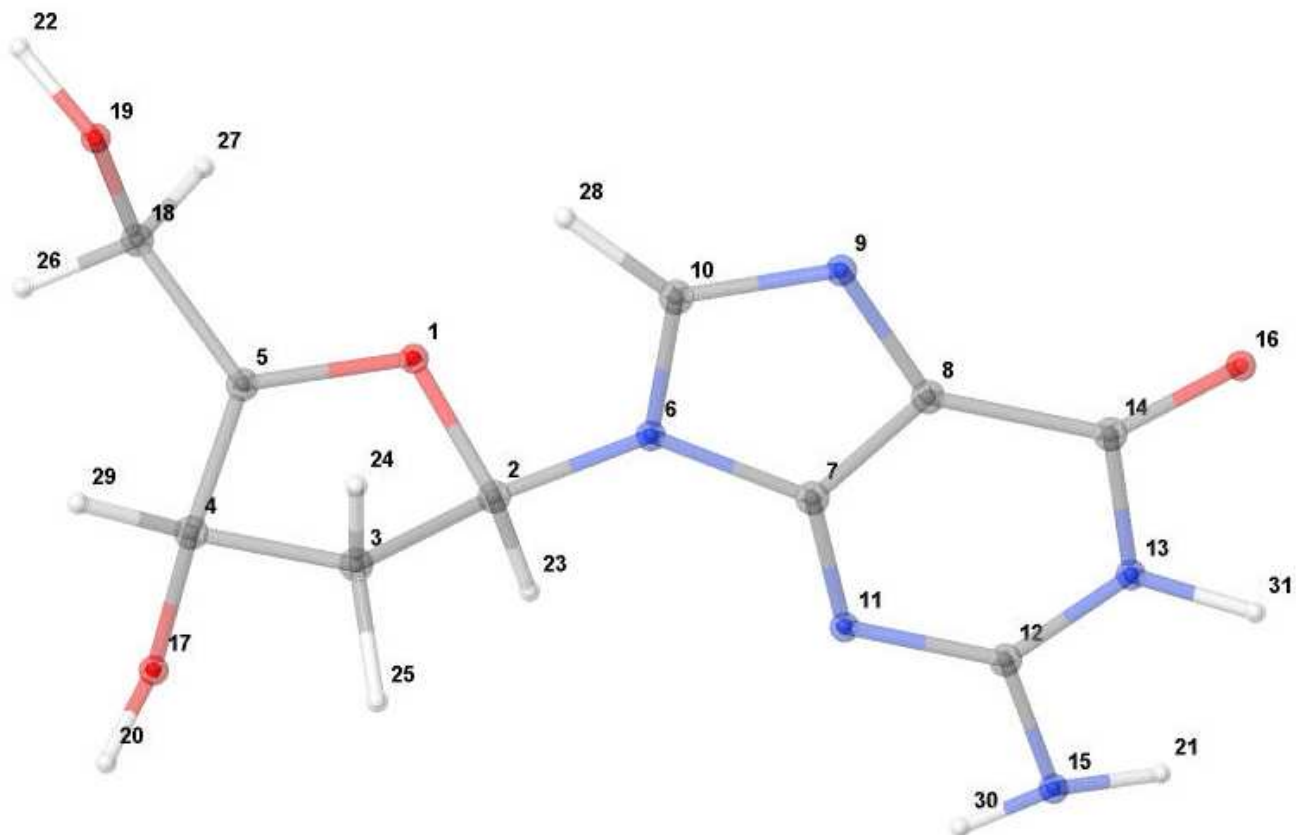

| atom     | Spin (1) | Isotropic Gauss |
|----------|----------|-----------------|
| 1 O(17)  | .116901  | -9.83518        |
| 2 C(13)  | .030216  | -1.23324        |
| 3 C(13)  | -.011565 | .46338          |
| 4 C(13)  | -.023744 | -8.20723        |
| 5 C(13)  | .839962  | 48.45674        |
| 6 N(14)  | .003231  | .18773          |
| 7 C(13)  | .011952  | .06931          |
| 8 C(13)  | .000664  | .02797          |
| 9 N(14)  | -.000644 | -.00455         |
| 10 C(13) | .004782  | .02060          |
| 11 N(14) | -.000443 | .04499          |
| 12 C(13) | -.000374 | .03787          |
| 13 N(14) | .000047  | .00509          |
| 14 C(13) | -.000472 | .00865          |
| 15 N(14) | -.000022 | -.00120         |
| 16 O(17) | .000110  | -.00500         |
| 17 O(17) | .002423  | -23.10410       |
| 18 C(13) | -.064173 | -.03757         |
| 19 O(17) | .015352  | -24.90018       |
| 20 H(1)  | .016433  | 4.53084         |
| 21 H(1)  | -.000008 | -.00170         |
| 22 H(1)  | .022498  | 5.89289         |
| 23 H(1)  | .000583  | 3.83510         |
| 24 H(1)  | .000621  | .36624          |
| 25 H(1)  | .001256  | .91097          |
| 26 H(1)  | .008118  | 7.11666         |
| 27 H(1)  | .004040  | 2.14668         |
| 28 H(1)  | -.000109 | .03522          |
| 29 H(1)  | .022291  | 9.41355         |
| 30 H(1)  | .000059  | .00055          |
| 31 H(1)  | .000017  | .00217          |



## dG(C5'•)

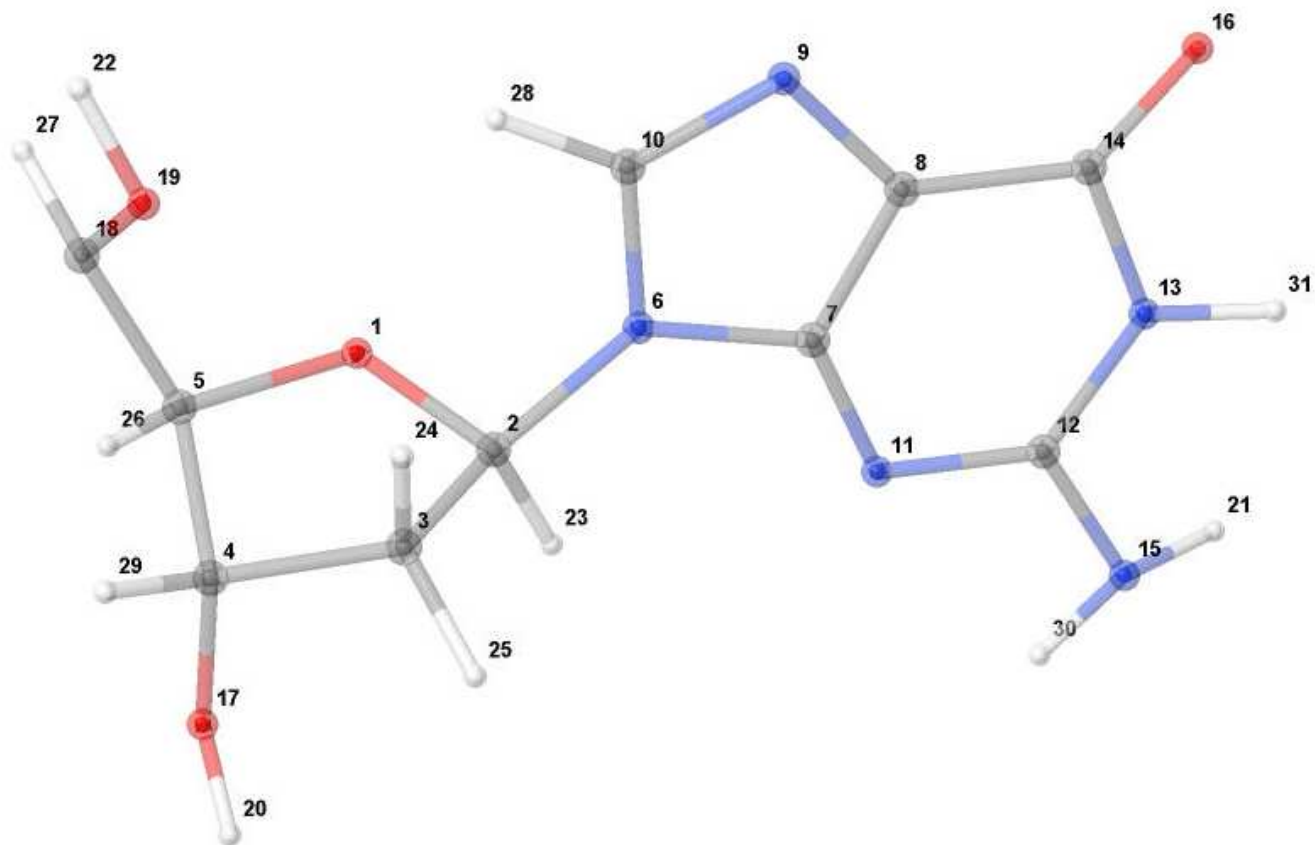

| atom     | Spin (1) | Isotropic Gauss |
|----------|----------|-----------------|
| 1 O(17)  | .028166  | -17.72113       |
| 2 C(13)  | .009646  | .50800          |
| 3 C(13)  | .013820  | -.11022         |
| 4 C(13)  | -.017880 | 4.74279         |
| 5 C(13)  | -.035726 | 1.55080         |
| 6 N(14)  | .003641  | .07573          |
| 7 C(13)  | -.006912 | .07515          |
| 8 C(13)  | .012552  | -.01276         |
| 9 N(14)  | .000204  | .03398          |
| 10 C(13) | -.008817 | .09186          |
| 11 N(14) | .000124  | .00442          |
| 12 C(13) | -.000067 | -.00270         |
| 13 N(14) | .000055  | .00095          |
| 14 C(13) | .001515  | -.00491         |
| 15 N(14) | .000002  | .00003          |
| 16 O(17) | -.000007 | .00034          |
| 17 O(17) | -.000019 | .02298          |
| 18 C(13) | .953522  | 58.32471        |
| 19 O(17) | .096312  | -8.29907        |
| 20 H(1)  | .000413  | .27229          |
| 21 H(1)  | .000000  | -.00020         |
| 22 H(1)  | -.005553 | -3.53749        |
| 23 H(1)  | .002073  | 1.52325         |
| 24 H(1)  | -.000177 | -.01212         |
| 25 H(1)  | .001286  | .52654          |
| 26 H(1)  | .003327  | .50050          |
| 27 H(1)  | -.042098 | -12.97841       |
| 28 H(1)  | .000081  | -.04932         |
| 29 H(1)  | -.009475 | .50200          |
| 30 H(1)  | -.000009 | -.00034         |
| 31 H(1)  | -.000001 | .00168          |
